# The American Journal of Psychiatry

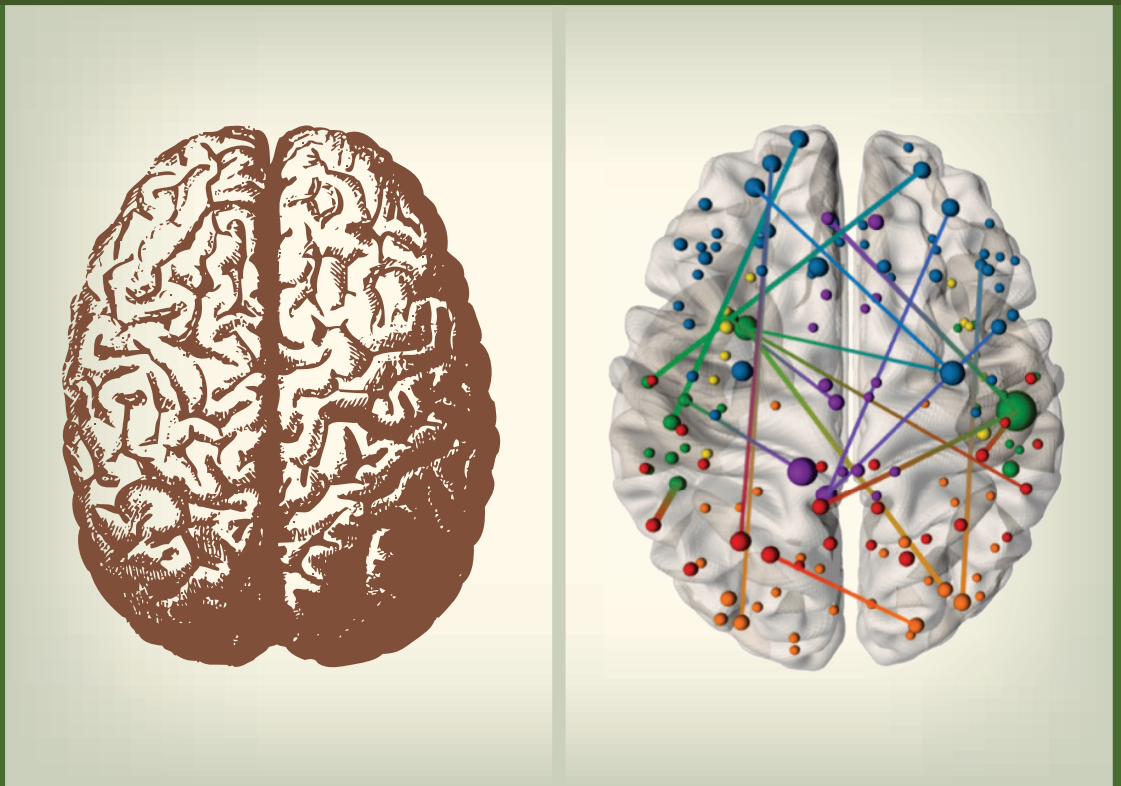

Using Neuroimaging to Characterize Brain Alterations  
Associated With Psychopathology

A Reckoning and Research Agenda for Neuroimaging in Psychiatry

Cerebellar-Prefrontal Network Connectivity and  
Negative Symptoms in Schizophrenia

Development and Validation of a Dementia Risk  
Prediction Model in the General Population
