## PERSPECTIVAS

### NOTA DEL EDITOR

- 495** **Uso de neuroimágenes para caracterizar alteraciones cerebrales asociadas a la psicopatología**  
*Ned H. Kalin, M.D.*

### EDITORIALES

- 498** **Disfunción cerebelosa y esquizofrenia: De la «dismetría cognitiva» a un potencial objetivo terapéutico**  
*Hengyi Cao, M.B., Ph.D., Tyrone D. Cannon, Ph.D.*
- 501** **Predicción del riesgo de demencia: ¿Está lista para la clínica?**  
*Sterling C. Johnson, Ph.D., Sanjay Asthana, M.D., F.A.C.P.*
- 503** **El enigma de las neuroimágenes en TDAH**  
*Jay N. Giedd, M.D.*
- 505** **Grosor cortical y conectividad en esquizofrenia**  
*Edward Bullmore, Ph.D., F.R.C.Psych.*

### REVISIÓN Y RESEÑAS

- 507** **Una estimación y agenda de investigación para las neuroimágenes en psiquiatría**  
*Amit Etkin, M.D., Ph.D.*

## NUEVAS INVESTIGACIONES

### ARTÍCULOS

- 512** **Conectividad de la red cerebelosa prefrontal y síntomas negativos en esquizofrenia**  
*Roscoe O. Brady, Jr., M.D., Ph.D., et al.* EDITORIALE • EMC • AUDIO  
Se utilizó IRM funcional para la identificación de marcadores basados en el cerebro, de síntomas negativos en esquizofrenia y para la estimulación magnética transcraneana de algunas regiones. Hay una relación causal implícita entre la conectividad disfuncional y la psicopatología.
- 521** **Estrategias neurales separables y replicables durante la función cerebral social en personas con y sin enfermedad mental grave**  
*Colin Hawco, Ph.D., et al.* EMC  
Se encontraron tres patrones neurales en individuos durante una tarea cerebral social, independientemente de la categoría de diagnóstico y en múltiples sitios y muestras. Dichos patrones pueden servir como medidas de resultado para la investigación sobre tratamientos con el objetivo de cambiar la función cerebral y mejorar el desempeño cognitivo.
- 531** **Imágenes cerebrales de la corteza en TDAH: Un análisis coordinado de muestras de gran tamaño clínicas y basadas en la población**  
*Martine Hoogman, Ph.D., et al.* EDITORIALE • VIDEO  
Las diferencias sutiles en el área de superficie cortical son generalizadas en niños, pero no en adolescentes ni adultos con trastorno por déficit de atención e hiperactividad (TDAH). Los resultados sugieren que dichas alteraciones se comportan como endofenotipos en familias y están ligadas a los síntomas de TDAH en la población, aumentando la evidencia que el TDAH se comporta como un rasgo continuo.
- 543** **Desarrollo y validación de un modelo de predicción de riesgo de demencia en la población general: Un análisis de tres estudios longitudinales**  
*Silvan Licher, M.D., et al.* EDITORIALE • EMC • VIDEO  
La integración de datos clínicos, neuropsicológicos y de imágenes identifica potenciales marcadores de riesgo para predecir el riesgo de demencia en 10 años. Los modelos de riesgo tuvieron un desempeño satisfactorio en las cohortes de validación.

## 552 Evidencia de reducciones del grosor cortical basadas en redes en esquizofrenia

Cassandra M.J. Wannan, B.App.Sc.(Hons), et al. **EDITORIALE**

Se identificó un patrón de aumento del grosor cortical a medida que aumenta la gravedad de la enfermedad, junto con evidencia consistente de que las regiones cerebrales más delgadas en grupos de pacientes están conectadas más estrechamente con regiones no afectadas, lo que sugiere una explicación de la ubicación de las reducciones de grosor cortical distribuidas irregularmente en la superficie cortical, encontradas en diferentes etapas de la enfermedad en esquizofrenia.

## 564 Asociación del aumento del plexo coroideo a fenotipos cognitivos, inflamatorios y estructurales en el espectro de la psicosis

Paulo Lizano, M.D., Ph.D., et al.

El aumento del plexo coroideo puede ser un endofenotipo estructural que marca el riesgo de enfermedad psicótica y puede ayudar a dilucidar las bases etiológicas de los trastornos psicóticos. El aumento del plexo coroideo se asoció a una peor cognición, un menor volumen total de sustancia gris y de la amígdala y un mayor volumen del ventrículo lateral.

### COMUNICADOS Y ACTUALIZACIONES

#### CARTAS AL EDITOR

## 573 Comentario sobre la relación entre la carga de la modalidad común de esquizofrenia y el número de descendientes en un biobanco del Reino Unido

Rebecca B. Lawn, B.Sc., et al.

## 574 La relación entre la carga de la modalidad común de esquizofrenia y el número de descendientes en un biobanco del Reino Unido: Respuesta a Lawn et al.

Valentina Escott-Price, Ph.D., et al.

## 575 Fumar y desempeño cognitivo: El problema el huevo y la gallina

Peter Hajek, M.A., Ph.D., et al.

## 575 El huevo enfermo o la gallina enferma: Dejar de fumar importa: Respuesta a Hajek et al.

Jentien M. Vermeulen, M.D., et al.

#### ACTOS OFICIALES DE LA APA

## 577 Informes a los socios

## 590 Libros recibidos

### OTROS TEMAS DE INTERÉS

## 591 Educación Médica Continuada

**Cubierta:** [With this issue, *The American Journal of Psychiatry* celebrates its 175th anniversary from the time when Amariah Brigham, M.D., published the first edition in July 1844. Over that time, while the manner in which the brain is viewed may have changed, the place where many read research about it has not. Cover image shows an illustration of the brain from 1851 alongside a figure from the current issue (Wannan et al., page 552). (Illustration: Shutterstock.com, © Pio3.)]

**AUDIO** Article is highlighted in AJP Audio, a downloadable .mp3 file available at [ajp.psychiatryonline.org](http://ajp.psychiatryonline.org)

**EDITORIALE** Article is discussed in one of the issue's editorials

**EMC** A course covering the content of this article is available online for paid subscribers to the AJP CME Course program

**VIDEO** Article is highlighted online by Deputy Editor Daniel S. Pine, M.D.

#### La Tabla de Contenidos y resúmenes de Este Número Está Disponible en Español

(Abstracts are also available in Spanish)

Translation presented in collaboration with the Office of Global Health, Rutgers-Robert Wood Johnson Medical School. Support for this effort provided by ACTA Colombia.

#### Translation courtesy of

Sergi Casals, M.A., Garuna, Medellín, Colombia ([www.garunaeditors.com](http://www.garunaeditors.com))

Carlos López Jaramillo, M.D., M.Sc., Ph.D., Universidad de Antioquia, Medellín, Colombia

Javier I. Escobar, M.D., M.Sc., Rutgers-Robert Wood Johnson Medical School

## Conectividad de la red cerebelosa prefrontal y síntomas negativos en esquizofrenia

Roscoe O. Brady, Jr., M.D., Ph.D., Irene Gonsalvez, M.D., Ivy Lee, B.S., Dost Öngür, M.D., Ph.D., Larry J. Seidman, Ph.D., Jeremy D. Schmahmann, M.D., Shaun M. Eack, Ph.D., Matcheri S. Keshavan, M.D., Alvaro Pascual-Leone, M.D., Ph.D., Mark A. Halko, Ph.D.

**Objetivo:** La interpretabilidad de los resultados en neuroimágenes de psiquiatría se ve significativamente limitada por el exceso de confianza en las relaciones de correlación. Los estudios puramente correlacionales no pueden determinar por sí mismos si las relaciones entre comportamiento e imágenes son causales, procesos compensatorios, o puramente epifenómenos de la enfermedad. Los síntomas negativos (p.ej., anhedonia, amotivación y déficits expresivos) son refractarios a los medicamentos actuales y están entre las causas principales de incapacidad en esquizofrenia. Los autores utilizaron un enfoque en dos etapas para identificar y posteriormente probar empíricamente un modelo de red cerebral de los síntomas de esquizofrenia.

**Método:** En la primera cohorte (N=44), se utilizó un análisis basado en datos, de la conectividad funcional en estadio de reposo para identificar una red con conectividad que corresponda a la gravedad de los síntomas negativos. En la segunda cohorte (N=11), esta conectividad de la red fue modulada con 5 días de estimulación magnética transcraneana (EMT) dos veces por día en la zona media del cerebelo.

**Resultados:** Una interrupción de la conectividad en una red específica de la corteza dorsolateral-prefrontal del cerebelo se relaciona directamente con la gravedad de los síntomas negativos. La restauración de la conectividad de la red con EMT se asocia con una mejora de los síntomas negativos, mostrando una relación fuerte, estadísticamente significativa entre el cambio de los síntomas negativos en respuesta al cambio de conectividad funcional.

**Conclusiones:** Estos resultados demuestran que una interrupción de la conectividad entre el cerebelo y la corteza prefrontal dorsolateral derecha está asociada a la gravedad de los síntomas negativos y que la corrección de dicha interrupción mejora la gravedad de los síntomas negativos. Los hallazgos apoyan una nueva hipótesis de las redes para los síntomas negativos refractarios a la medicación y sugieren que la manipulación de las redes puede establecer relaciones causales entre los marcadores de las redes y los fenómenos clínicos.

(*Am J Psychiatry* 2019; 176:512–520)

## Estrategias neurales separables y replicables durante la función cerebral social en personas con y sin enfermedad mental grave

Colin Hawco, Ph.D., Robert W. Buchanan, M.D., Navona Calarco, B.A., Benoit H. Mulsant, M.D., Joseph D. Viviano, M.Sc., Erin W. Dickie, Ph.D., Miklos Argyelan, M.D., James M. Gold, Ph.D., Marco Iacoboni, M.D., Pamela DeRosse, Ph.D., George Foussias, M.D., Ph.D., Anil K. Malhotra, M.D., Aristotle N. Voineskos, M.D., Ph.D., for the SPINS Group

**Objetivo:** El diseño de estudio de casos y controles y la heterogeneidad de la enfermedad pueden impedir el descubrimiento de biomarcadores en trastornos cerebrales, incluyendo las enfermedades mentales graves. Para identificar subgrupos de individuos con base en aspectos biológicos y/o comportamentales, y no con base en el diagnóstico, los autores utilizaron agrupación (*clustering*) jerárquica para identificar individuos con patrones similares de actividad cerebral durante una tarea de IRM funcional de imitación/observación facial.

**Método:** Se realizó un escáner de IRM en tres sedes a participantes en el estudio Iniciativa de Procesos Sociales en la Neurobiología de la(s) Esquizofrenia(s) (N=179; 109 con un trastorno del espectro de la esquizofrenia y 70 participantes sanos de control). Se utilizó la agrupación jerárquica para identificar nuevos grupos de participantes con base en datos; las diferencias en las pruebas sociales y neurocognitivas realizadas fuera del escáner se compararon entre los nuevos grupos.

**Resultados:** Se encontraron tres grupos (*clusters*) con patrones distintos de actividad neural. La pertenencia a uno de los grupos no estuvo relacionada con el diagnóstico ni con el si-

tio donde se realizó el escáner. El grupo más grande consistió en "activadores típicos", con actividad en el circuito canónico de "estimulación". Los otros grupos representaron un grupo "hiperactivador" y un grupo "desactivador". Las distancias euclídeas entre participantes fueron menores dentro de los grupos que dentro de cada sede o grupo diagnóstico. El grupo desactivador tuvo los resultados más altos en las pruebas sociales cognitivas y neurocognitivas. El análisis de la agrupación jerárquica se repitió en una muestra de réplica (N=108; 32 participantes con un trastorno del espectro de la esquizofrenia, 37 con trastorno bipolar eutímico y 39 sujetos sanos de control), que arrojó los tres mismos patrones de grupos.

**Conclusiones:** Los hallazgos del estudio demuestran patrones diferentes y replicables de actividad neural durante una tarea socio-emocional, independiente del diagnóstico del DSM o del sitio del escáner. Los hallazgos pueden ofrecer parámetros objetivos de neuroimágenes (biomarcadores) para subgrupos de individuos en investigaciones enfocadas en asociaciones entre individuos con el objetivo de fomentar el desempeño cognitivo independiente de la categoría diagnóstica.

(*Am J Psychiatry* 2019; 176:521–530)

# Imágenes cerebrales de la corteza en TDAH: Un análisis coordinado de muestras de gran tamaño clínicas y basadas en la población

Martine Hoogman, Ph.D., Ryan Muetzel, Ph.D., Joao P. Guimaraes, M.Sc., Elena Shumskaya, Ph.D., Maarten Mennes, Ph.D., Marcel P. Zwiers, Ph.D., Neda Jahanshad, Ph.D., Gustavo Sudre, Ph.D., Thomas Wolfers, Ph.D., Eric A. Earl, B.Sc., Juan Carlos Soliva Vila, Ph.D., Yolanda Vives-Gilbert, Ph.D., Sabin Khadka, M.Sc., Stephanie E. Novotny, M.Sc., Catharina A. Hartman, Ph.D., Dirk J. Heslenfeld, Ph.D., Lizzanne J.S. Schweren, Ph.D., Sara Ambrosino, M.D., Bob Oranje, Ph.D., Patrick de Zeeuw, Ph.D., Tiffany M. Chaim-Avancini, Ph.D., Pedro G.P. Rosa, M.D., Marcus V. Zanetti, Ph.D., Charles B. Malpas, Ph.D., Gregor Kohls, Ph.D., Georg G. von Polier, M.D., Jochen Seitz, M.D., Joseph Biederman, M.D., Alysia E. Doyle, Ph.D., Anders M. Dale, Ph.D., Theo G.M. van Erp, Ph.D., Jeffery N. Epstein, Ph.D., Terry L. Jernigan, Ph.D., Ramona Baur-Streubel, Ph.D., Georg C. Ziegler, M.D., Kathrin C. Zierhut, Ph.D., Anouk Schranke, Ph.D., Marie F. Høvik, M.D., Astri J. Lundervold, Ph.D., Clare Kelly, Ph.D., Hazel McCarthy, Ph.D., Norbert Skokauskas, M.D., Ph.D., Ruth L. O’Gorman Tuura, Ph.D., Anna Calvo, M.Sc., Sara Lera-Miguel, Ph.D., Rosa Nicolau, B.Sc., Kaylita C. Chantiluke, Ph.D., Anastasia Christakou, Ph.D., Alasdair Vance, M.D., Mara Cercignani, Ph.D., Matt C. Gabel, Ph.D., Philip Asherson, Ph.D., Sarah Baumeister, Ph.D., Daniel Brandeis, Ph.D., Sarah Hohmann, M.D., Ivanei E. Bramati, Ph.D., Fernanda Tovar-Moll, M.D., Ph.D., Andreas J. Fallgatter, M.D., Bernd Kardatzki, B.Sc., Lena Schwarz, M.D., Anatoly Anikin, Ph.D., Alexandr Baranov, Ph.D., Tinatin Gogberashvili, Ph.D., Dmitry Kapilushniy, Ph.D., Anastasia Solovieva, Ph.D., Hanan El Marroun, Ph.D., Tonya White, M.D., Ph.D., Georgii Karkashadze, Ph.D., Leyla Namazova-Baranova, Ph.D., Thomas Ethofer, Ph.D., Paulo Mattos, M.D., Ph.D., Tobias Banaschewski, M.D., Ph.D., David Coghill, M.D., Kerstin J. Plessen, M.D., Ph.D., Jonna Kuntsi, Ph.D., Mitul A. Mehta, Ph.D., Yannis Paloyelis, Ph.D., Neil A. Harrison, Ph.D., Mark A. Bellgrove, Ph.D., Tim J. Silk, Ph.D., Ana I. Cubillo, Ph.D., Katya Rubia, Ph.D., Luisa Lazaro, M.D., Ph.D., Silvia Brem, Ph.D., Susanne Walitza, M.D., Thomas Frodl, M.D., Ph.D., Mariam Zentis, M.D., Francisco X. Castellanos, M.D., Yuliya N. Yoncheva, Ph.D., Jan Haavik, M.D., Ph.D., Liesbeth Reneman, M.D., Ph.D., Annette Conzelmann, Ph.D., Klaus-Peter Lesch, M.D., Ph.D., Paul Pauli, Ph.D., Andreas Reif, M.D., Leanne Tamm, Ph.D., Kerstin Konrad, Ph.D., Eileen Oberwelland Weiss, Ph.D., Geraldo F. Busatto, Ph.D., Mario R. Louza, M.D., Ph.D., Sarah Durston, Ph.D., Pieter J. Hoekstra, M.D., Ph.D., Jaap Oosterlaan, Ph.D., Michael C. Stevens, Ph.D., J. Antoni Ramos-Quiroga, M.D., Ph.D., Oscar Vilarroya, Ph.D., Damien A. Fair, Ph.D., Joel T. Nigg, Ph.D., Paul M. Thompson, Ph.D., Jan K. Buitelaar, M.D., Ph.D., Stephen V. Faraone, Ph.D., Philip Shaw, M.D., Ph.D., Henning Tiemeier, Ph.D., Janita Bralten, Ph.D., Barbara Franke, Ph.D.

**Objetivo:** Los estudios de neuroimágenes muestran alteraciones estructurales de varias regiones cerebrales en niños y adultos con trastorno por déficit de atención e hiperactividad (TDAH) aunque son frecuentes los casos en que no se logran replicar. El objetivo de los autores fue identificar características corticales relacionadas con el TDAH utilizando estudios de gran escala.

**Método:** El área de superficie y el grosor corticales (basados en el atlas de Desikan–Killiany) se compararon entre los sujetos con TDAH (N=2.246) y los sujetos control (N=1.934) para niños, adolescentes y adultos por separado en ENIGMA-ADHD, un consorcio de 36 centros. Para evaluar los efectos familiares en las medidas corticales, se compararon los sujetos de caso, los hermanos no afectados y los sujetos control en el estudio NeuroIMAGE (N=506). Las asociaciones de la escala de atención de la Lista de chequeo de comportamiento infantil (*Child Behavior Checklist*) con las medidas corticales se determinaron en una muestra de población pediátrica (Generación-R, N=2.707).

**Resultados:** En la muestra ENIGMA-ADHD, se encontraron valores inferiores del área de superficie en niños con TDAH, principalmente en las regiones frontal, cingulada y temporal;

el efecto significativo más grande fue para el área de superficie total (d de Cohen= -0,21). El grosor cortical del giro fusiforme y del polo temporal también fue inferior en niños con TDAH. No se encontraron diferencias en el área de superficie ni en el grosor en los grupos de adolescentes y de adultos. Se vieron efectos familiares en el área de superficie en varias regiones. En una serie de regiones que se superponen, el área de superficie, pero no el grosor, se asoció a problemas anteriores en la muestra de la Generación-R.

**Conclusiones:** Las diferencias sutiles en el área de superficie cortical son generalizadas en niños, pero no en adolescentes ni adultos con TDAH, lo que confirma la implicación de la corteza frontal y pone de relieve las regiones a las que hay que prestar mayor atención. En particular, las alteraciones se comportan como endofenotipos en familias y están ligadas a los síntomas de TDAH en la población, aumentando la evidencia que el TDAH se comporta como un rasgo continuo en la población. Futuros estudios longitudinales deben aclarar trayectorias de vida individuales que conducen a hallazgos no significativos en grupos de adolescentes y de adultos a pesar de la presencia de un diagnóstico de TDAH.

(*Am J Psychiatry* 2019; 176:531–542)

## Desarrollo y validación de un modelo de predicción de riesgo de demencia en la población general: Un análisis de tres estudios longitudinales

Silvan Licher, M.D., Maarten J.G. Leening, M.D., Ph.D., Pinar Yilmaz, M.D., Frank J. Wolters, M.D., Ph.D., Jan Heeringa, M.D., Ph.D., Patrick J.E. Bindels, M.D., Ph.D., Alzheimer's Disease Neuroimaging Initiative, Meike W. Vernooij, M.D., Ph.D., Blossom C.M. Stephan, Ph.D., Ewout W. Steyerberg, Ph.D., M. Kamran Ikram, M.D., Ph.D., M. Arfan Ikram, M.D., Ph.D.

**Objetivo:** La identificación de individuos en alto riesgo de demencia es imprescindible para el desarrollo de estrategias de prevención, pero no hay herramientas confiables para la estratificación del riesgo en la población. Los autores desarrollaron y validaron un modelo de predicción para calcular el riesgo absoluto de desarrollar demencia en 10 años en una población que envejece.

**Método:** En una cohorte grande, prospectiva, basada en la población, se recogieron datos de parámetros demográficos, clínicos, neuropsicológicos, genéticos y de neuroimágenes de 2.710 individuos sin demencia, de 60 años o más, examinados entre 1995 y 2011. Se derivaron un modelo básico y uno extendido para predecir el riesgo de demencia en 10 años, teniendo en cuenta otros riesgos de muerte debidos a otras causas. El desempeño de los modelos se evaluó utilizando estadísticas C, corregidas por optimismo y esquemas de calibración, y los modelos se validaron externamente en el estudio holandés basado en la población de prevención epidemiológica de Zoetermeer y en la cohorte 1 de la Iniciativa de Neuroimágenes de la Enfermedad de Alzheimer (ADNI-1, por sus siglas en inglés).

**Resultados:** Durante un seguimiento de 20.324 persona-años, 181 participantes desarrollaron demencia. Un modelo básico de riesgo de demencia utilizando la edad, el historial de derrame, el declive de la memoria subjetiva y la necesidad de ayuda con las finanzas o la medicación dio una estadística C de 0,78 (IC 95%=0,75; 0,81). Posteriormente, un modelo extendido que incorporaba el modelo básico y, además, predictores cognitivos, genéticos y de neuroimágenes, dio una estadística C de 0,86 (IC 95%=0,83; 0,88). Los modelos tuvieron buen desempeño en cohortes de validación externa de Europa y de Estados Unidos.

**Conclusiones:** En individuos que residen en una comunidad, el riesgo de demencia en 10 años se puede predecir con precisión combinando información de predictores fácilmente disponibles en el entorno de atención primaria. La predicción de demencia puede mejorarse utilizando datos del desempeño cognitivo, de genotipos y de imágenes cerebrales. Estos modelos pueden utilizarse para identificar individuos en alto riesgo de demencia en la población y pueden informar el diseño de ensayos clínicos.

*(Am J Psychiatry 2019; 176:543–551)*

## Evidencia de reducciones del grosor cortical basadas en redes en esquizofrenia

Cassandra M.J. Wannan, B.App.Sc.(Hons), Vanessa L. Cropley, Ph.D., M. Mallar Chakravarty, Ph.D., Chad Bousman, Ph.D., Eleni P. Ganella, Ph.D., Jason M. Bruggemann, Ph.D., Thomas W. Weickert, M.Phil., Ph.D., Cynthia Shannon Weickert, Ph.D., Ian Everall, D.Sc., F.R.C.Psych., Patrick McGorry, M.D., Ph.D., Dennis Velakoulis, M.B.B.S., F.R.A.N.Z.P., Stephen J. Wood, Ph.D., Cali F. Bartholomeusz, Ph.D., Christos Pantelis, M.D., F.R.C.Psych., Andrew Zalesky, Ph.D.

**Objetivo:** Las reducciones del grosor cortical en esquizofrenia están distribuidas de forma irregular en múltiples sitios (*loci*). La hipótesis de los autores era que las redes de conectividad cortical explicarían la distribución de las reducciones del grosor cortical en la corteza y, concretamente, que la conectividad córtico-cortical entre sitios con estas reducciones sería excepcionalmente fuerte y formaría una red interconectada. Se comprobó esta hipótesis en tres cohortes de esquizofrenia transversales: primer episodio de psicosis, esquizofrenia crónica y esquizofrenia resistente al tratamiento.

**Método:** Se obtuvieron imágenes cerebrales estructurales para 70 pacientes con primer episodio de psicosis, 153 pacientes con esquizofrenia crónica y 47 pacientes con esquizofrenia resistente al tratamiento y en grupos control sanos para las comparaciones (N=57, N=168 y N=54, respectivamente). El grosor cortical se comparó entre los grupos de pacientes y los respectivos grupos de control en 148 regiones en toda la corteza. La fuerza de la conectividad estructural entre pares de regiones corticales se cuantificó con análisis estructural de covarianza. La fuerza de la conectividad entre regiones con reducciones del grosor cortical se comparó con la fuerza de la conectividad entre 5.000 grupos de regiones escogidas aleatoriamente para establecer si la interconexión

entre regiones con reducciones era más fuerte de lo que se esperaría por azar.

**Resultados:** Se encontraron reducciones del grosor cortical significativas (con corrección de la tasa de descubrimiento falso) y generalizadas en los grupos de esquizofrenia crónica (79 regiones) y esquizofrenia resistente al tratamiento (106 regiones). Las reducciones del grosor cortical con los mayores tamaños de efecto se encontraron en las regiones frontal, temporal, cingulada e insular. En todas las cohortes, tanto los grupos de pacientes como los de controles sanos mostraron un aumento significativo de covarianza estructural entre las regiones con reducciones de grosor cortical en comparación con regiones seleccionadas aleatoriamente.

**Conclusiones:** La arquitectura de las redes cerebrales puede explicar la distribución topográfica irregular de las reducciones del grosor cortical en esquizofrenia. Este hallazgo, replicado en tres cohortes distintas de esquizofrenia, sugiere que el efecto es robusto e independiente de la etapa de la enfermedad.

(*Am J Psychiatry* 2019; 176:552–563)

## Asociación del aumento del plexo coroideo a fenotipos cognitivos, inflamatorios y estructurales en el espectro de la psicosis

Paulo Lizano, M.D., Ph.D., Olivia Lutz, B.S., George Ling, M.S., Adam M. Lee, Ph.D., Seenae Eum, Pharm.D., Jeffrey R. Bishop, Pharm.D., Sinead Kelly, Ph.D., Ofer Pasternak, Ph.D., Brett Clementz, Ph.D., Godfrey Pearlson, M.D., John A. Sweeney, Ph.D., Elliot Gershon, M.D., Carol Tamminga, M.D., Matcheri Keshavan, M.D.

**Objetivo:** El plexo coroideo es una barrera fisiológica importante y produce LCR y factores neurotróficos, angiogénicos e inflamatorios implicados en el desarrollo cerebral. Las anomalías del plexo coroideo han estado implicadas tanto en la esquizofrenia como en el trastorno bipolar. Un análisis transcriptómico previo del plexo coroideo de la esquizofrenia identificó un aumento de genes inmunes y anti-inflamatorios que se correlacionaron con marcadores inflamatorios periféricos. El propósito de este estudio fue examinar el volumen del plexo coroideo en sujetos en todo el espectro de la psicosis y en sus familiares de primer grado y con eje II clúster A, así como la distribución familiar del plexo coroideo y la varianza del plexo coroideo con medidas clínicas, cognitivas, cerebrales y de marcadores periféricos.

**Método:** El volumen del plexo coroideo se cuantificó (utilizando *FreeSurfer*) en sujetos con psicosis (probandos), sus familiares de primer grado y con eje II clúster A y sujetos sanos de control, organizados por diagnóstico del DSM-IV-TR. Se recogieron datos sobre analitos, conectividad estructural y genotipos, de un subgrupo de los sujetos de estudio.

**Resultados:** El volumen del plexo coroideo fue significativamente mayor en los probandos, en comparación con los familiares de primer grado o los sujetos sanos de control; los familiares de primer grado tuvieron un aumento intermedio en comparación con los sujetos sanos de control; y el volumen total del plexo coroideo fue significativamente hereditario. El mayor volumen se asoció a una peor cognición, un volumen total inferior de sustancia gris y de la amígdala, un mayor volumen del ventrículo lateral y una menor conectividad estructural en los probandos. También se observaron asociaciones entre un mayor volumen y niveles más altos de interleukina 6 en los probandos.

**Conclusiones:** Estos hallazgos sugieren que el plexo coroideo está implicado en todo el espectro de psicosis con un potencial mecanismo fisiopatológico que involucra el eje neuroinmune, cuya función es mantener la homeostasis cerebral e interactuar con el sistema inmune e inflamatorio periférico. El plexo coroideo puede ser un objetivo importante en futuras investigaciones.

(*Am J Psychiatry* 2019; 176:564–572)
