## Shaping medicine for the future

Join us at the cutting edge of medical innovation

**Head, Department of Psychological Medicine,  
National University Hospital (NUH) and  
National University of Singapore, Yong Loo Lin School  
of Medicine (NUS Medicine)**

Established in 1979, the Department of Psychological Medicine, NUH & NUS Medicine, provides quality inpatient and outpatient psychiatric clinical care for the general population of Singapore. The department prides itself on the academic research faculty and clinicians who work to advance the vision of the NUHS University Medicine Cluster and NUS Medicine, of which the department is a part. The vision and strategic development affirm the diverse scope, past achievements, and distinct career paths of the department's multi-disciplinary faculty and also provides the rationale for future growth. The department excels in psychiatric teaching and training for undergraduate and post-graduate students. A strong emphasis is also placed on research as an important means to further their knowledge in the field.

NUH and NUS Medicine are part of the National University Health System (NUHS) which includes three tertiary, acute and community hospitals, three National Specialty Centres, the National University Polyclinics (NUP), Jurong Medical Centre, and three NUS health sciences schools in Medicine & Nursing, Dentistry and Public Health. As a Regional Health System, NUHS works closely with health and social care partners across Singapore to develop and implement programmes that contribute to a healthy and engaged population in the Western part of Singapore. For more information, please visit [www.nuhs.edu.sg](http://www.nuhs.edu.sg)

The Head of Department will be responsible for developing the vision and strategic goals of the department to integrate clinical service, research and education, to drive the implementation of the department's initiatives and contribute to the overall vision and goals of NUH, NUS Medicine and NUHS. The Head of Department will be accountable to the Senior Management of NUH, NUS Medicine and NUHS for the overall administration and compliance of the department with the operational policies and guidelines set by the NUH and NUS Medicine.

**The candidate should possess (but not limited to) the following qualifications, experience and qualities:**

- Registered Specialist with Singapore Medical Council with a recognised postgraduate qualification such as Master of Medicine or relevant qualification in Psychological Medicine. For overseas applicants, appointment will be subject to approval from Ministry of Health and Singapore Medical Council.
- Nationally, regionally or internationally recognised with good professional standings and possess an established record in academic activities, where appropriate for the position.
- Experience in leading a team and planning for clinical, educational or research initiatives/development, with a track record of leadership and/or high level of participation at national committees, regional/international expert or professional societies.
- Advocate NUHS values of teamwork, respect, integrity, compassion, excellence and patient-centeredness with values of accountability and service before self with strong commitment to caring for and development of staff in the department.
- At least 2 years of clinical experience at specialist level.

If you are keen to apply, please submit a detailed CV including the contact details of your 6 appointed character referees (name, designation, institution's name and email address) and a write-up on your vision and a 3-year strategic plan (comprising NUHS 3 missions – Clinical, Education and Research development) for the Department of Psychological Medicine, NUH & NUS Medicine to:

**Ms Clara Wee [Chief Human Resource Officer, National University Hospital, NUHS Tower Block, Level 6]  
E-mail: [clara\\_wee@nuhs.edu.sg](mailto:clara_wee@nuhs.edu.sg)**

**Closing Date: 30 August 2019**

Shape the future of global biomedical healthcare. Challenge yourself to take the lead. Drive a new beginning with NUHS.

## MEDICAL CONSULTANT POST IN IRELAND

- **Consultant Psychiatrist in  
the Psychiatry of Old Age**

CHO 1

**Donegal West Mental Health Services**

Closing date 3pm Thursday 11th July 2019

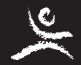

**publicjobs.ie**

An tSeirbhís um Cheapacháin Phoiblí  
Public Appointments Service

**We are committed to a policy of equal opportunity and  
encourage applications under all nine grounds of the  
Employment Equality Act.**

**Cuirfear fáilte roimh chomhfhreagras  
i nGaeilge**

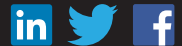

**APA Membership  
for every step of  
your career**  
**Join us today**

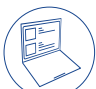

**World-Class Learning**

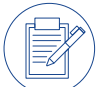

**Practice Resources**

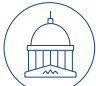

**Advocacy for Mental Health**

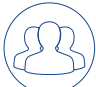

**A Professional Community**

[psychiatry.org/JoinAPA](http://psychiatry.org/JoinAPA)

Former member? You're likely eligible for dues amnesty. Contact us at [membership@psych.org](mailto:membership@psych.org) or 1-888-357-7924 for more information.

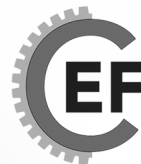

**Comprehensive  
Executive  
Function  
Inventory**

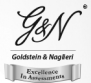

Jack A. Naglieri, Ph.D. & Sam Goldstein, Ph.D.

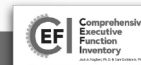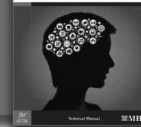

**Executive Function  
Scores You Can  
Trust!**

**The most representative nationally  
normed behavior rating scale  
of executive function.**

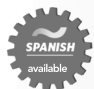

Provides a comprehensive  
evaluation of executive function  
strengths and weaknesses in  
youth aged 5 to 18 years.

# AMERICAN PSYCHIATRIC ASSOCIATION

## Director of Research & Deputy Medical Director

The American Psychiatric Association is seeking a Director of Research & Deputy Medical Director. As the Director, you will be responsible for all aspects of the administration and management of APA's prestigious Research Division. In this role you would have the opportunity to develop, in collaboration with other APA components, an agenda and priorities for clinical services research that address the needs of psychiatrists, patients, and other stakeholders. Additionally, you will use your expertise, along with the expertise of other APA departments, to develop and implement activities to improve the quality and cost-effectiveness of mental health and substance use services delivered by psychiatrists and other clinicians. This is a dynamic opportunity that serves as the liaison to the NIH, SAMHSA, and other federal and non-federal agencies and organizations with interests in mental health issues including ACNP, AFSP, ADAA, and Society of Biological Psychiatry.

### ESSENTIAL DUTIES AND RESPONSIBILITIES

- Oversee the expansion and operation of a large, national registry as well as associated practice-based research networks. Develop a plan for and direct the use of this national research infrastructure to improve psychiatric diagnosis, treatment, prevention and outcomes in the U.S.
- Organize an effort to expand research capacity in psychiatry, including but not limited to, building research training, mentoring and technical assistance infrastructures, etc. by working with various research and academic organizations, patient advocacy groups, and funders.
- Direct or supervise all maintenance and revision activities of the Diagnostic and Statistical Manual of Mental Disorders (DSM).
- Provide scientific consultation to the CEO/Medical Director and Divisions and Departments of the APA to assure legislative policy positions, media presentations, and testimony for Congressional Committees and Federal Agencies concerning APA policy positions are supported by the latest research.

- Serve as scientific liaison with international agencies and organizations involved in mental health issues (e.g., WHO/ICD).
- Keep abreast of funding opportunities and take the initiative and lead in organizing and/or writing grants in areas pertinent to the activities of the office.
- Supervise component liaisons with the APA Council on Research, and all of their respective Committees.
- Include consultation and services to the APA Foundation annual evaluations, projects, and awards (e.g., Research Fellowship).
- Responsible for all budgetary formulation and management of the department programs, and for the appropriate supervision and evaluation of program staff.
- Performs other duties as assigned.

### REQUIRED SKILLS, EXPERIENCE, AND QUALIFICATIONS

- MD (must be a psychiatrist), with at least 15 years of experience.
- Experience in developing and monitoring research (scientific, clinical, population-based, psychiatric epidemiology, and/or health services research) and department budgets as well as supervision of staff.
- Ability to analyze a variety of complex administrative and organizational problems and make sound policy and procedural recommendations.
- Excellent oral and written communications skills with ability to effectively interact with APA leadership, members, staff, and staff of other organizations.
- Senior level research investigator and research administration experience in Federal Research Institutes or major Academic Institutions that demonstrates a national perspective and reputation in the area of mental health research.
- Experience in writing successful grant applications to Federal or private foundation granting agencies.

**Please visit our website to apply for the position:**  
<https://www.psychiatry.org/about-apa/work-at-apa>

JUST PUBLISHED!

## Competency in Combining Pharmacotherapy and Psychotherapy Integrated and Split Treatment, Second Edition

### Core Competencies in Psychotherapy

Michelle B. Riba, M.D., M.S., Richard Balon, M.D.,  
and Laura Weiss Roberts, M.D., M.A.

Series Editor: Glen O. Gabbard, M.D.

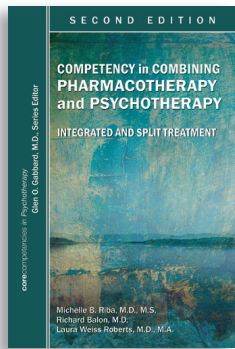

This book is designed to help psychiatrists at any stage of their career achieve competency in combining and coordinating pharmacotherapeutic and psychotherapeutic treatments for the benefit of their patients.

This second edition, addresses both integrated (single clinician) and split/collaborative (multiple clinicians) treatments, discussing for each:

- The selection of medication and psychotherapy
- The patient evaluation and opening
- Sequencing
- Evaluating, monitoring, and supervising treatment
- Terminating and transitioning patient care

The book also offers a chapter—new to this second edition—that focuses on primary care access for mental health services in the context of integrated and split/collaborative care.

2018 • 175 pages • ISBN 978-1-61537-066-5 • Paperback • \$65.00 • Item #37066

2018 • 175 pages • ISBN 978-1-61537-180-8 • eBook • \$52.00 • Item #37180

**20% Discount for American Psychiatric Association Members**

**25% Discount for APA Resident-Fellow Members**

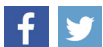

AMERICAN  
PSYCHIATRIC  
ASSOCIATION  
PUBLISHING

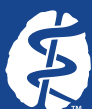

Order @ [www.appi.org](http://www.appi.org)

Email: [appi@psych.org](mailto:appi@psych.org)

Phone: 1-800-368-5777

Priority Code AH1805A

## Psychiatrist Inpatient/Outpatient WISCONSIN

HealthPartners Medical Group is a top Upper Midwest multispecialty physician practice based in Minnesota and western Wisconsin. Our award-winning Behavioral Health team is 25+ psychiatrists strong and focused in multidisciplinary inpatient and outpatient settings. Together with social workers, nurses, PAs, therapists and OTs, we provide exceptional care to our community and are dedicated to the health and well-being of our patients.

We have an exciting full-time opportunity for a talented and caring BC/BE Psychiatrist to join our group at the Amery Hospital & Clinic (AHC) in beautiful Amery, Wisconsin. This key position provides direct inpatient and outpatient care as part of our psychiatric treatment program at AHC and nearby care sites. Leadership and other practice growth opportunities are available.

AHC is a progressive western Wisconsin community hospital located about an hour east of the Minneapolis/St. Paul metropolitan area. The Amery community offers the variety of a larger city with a sense of hometown hospitality. With an excellent school system and abundant sporting/outdoor/recreational offerings, Amery is an ideal place to put down family and practice roots. For hospital and community information, visit [www.amerymedicalcenter.org](http://www.amerymedicalcenter.org) and [www.amerywisconsin.org](http://www.amerywisconsin.org).

HealthPartners offers a competitive compensation and benefits package, paid malpractice coverage and a rewarding practice environment with support from our Twin Cities-based group. For consideration, please apply online at [healthpartners.com/careers](http://healthpartners.com/careers), forward your CV and cover letter to [lori.m.fake@healthpartners.com](mailto:lori.m.fake@healthpartners.com), or call Lori at 800-472-4695 x1. EOE

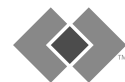

HealthPartners®

*Ariella, an artist, musician, and real person living with schizophrenia*

SCHIZOPHRENIA  
DIAGNOSIS

EXPERIENCED  
SIDE EFFECTS

STARTED  
COLLEGE

STARTED  
MEDICATION

STOPPED  
MEDICATION

G  
R  
A  
D  
U  
A  
T  
I  
O  
N

# Schizophrenia shouldn't derail her life

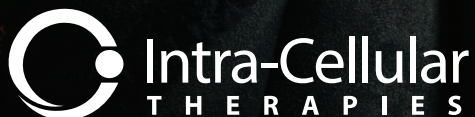

BUILT ON NOBEL PRIZE-WINNING SCIENCE

Visit [SZJourney.com](http://SZJourney.com) to learn more
